# Supplementary material for: Electrodiffusioosmosis induced negative differential resistance in micro-to-millimeter size pores through a graphene/copper membrane
Source: Royal Society of Chemistry journal article supplement (doi:10.1039/d2na00443g), 2022-01-01
Supplement: d2na00443g1.pdf [file d2na00443g1.pdf]

## Supplementary Information

### Electrodifusioosmosis induced negative differential resistance in micro-to-millimeter size pores through graphene/copper membrane

*Sharad Kumar Yadav<sup>A,B,C</sup>, Manikandan D<sup>B</sup>, Chob Singh<sup>B</sup>, Mukesh Kumar<sup>B</sup>, Vishal V. R. Nandigana<sup>A,C</sup> and Pramoda K. Nayak<sup>B,C,D\*</sup>*

*<sup>A</sup>Department of Mechanical Engineering, Indian Institute of Technology Madras, Chennai 600036, India*

*<sup>B</sup>Department of Physics, Indian Institute of Technology Madras, Chennai 600 036, India*

*<sup>C</sup>Micro Nano and Bio-Fluidics Group, Indian Institute of Technology Madras, Chennai-600036, India*

*<sup>D</sup>2D Materials Research and Innovation Group, Indian Institute of Technology Madras, Chennai-600036, India*

*\*Corresponding author:*

*E-mail address: [pnayak@iitm.ac.in](mailto:pnayak@iitm.ac.in) (P.K. Nayak)*

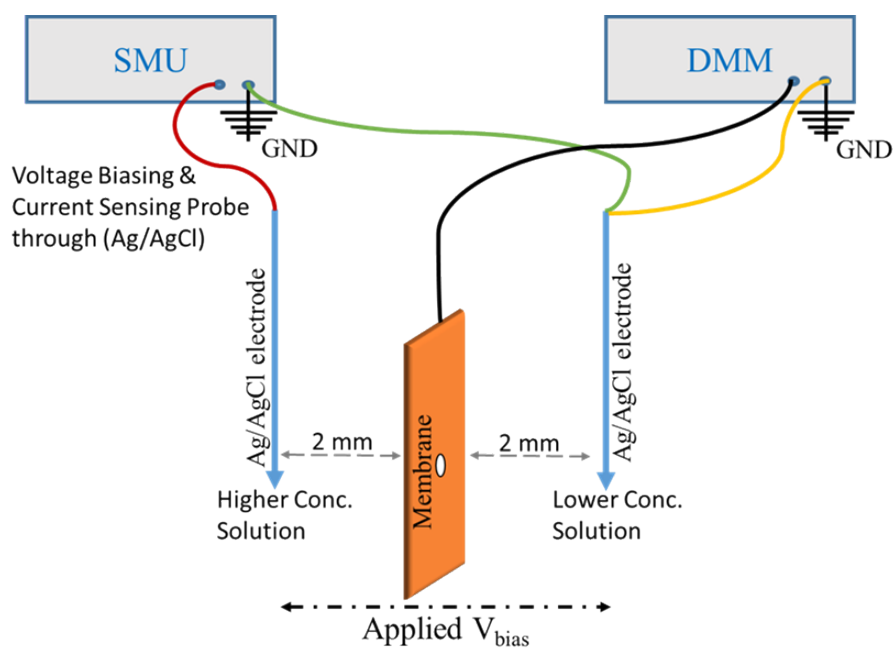

**Figure S1.** Schematic of the experimental setup connections and the steps to sandwich the Gr/Cu membrane between the silicone O-ring.

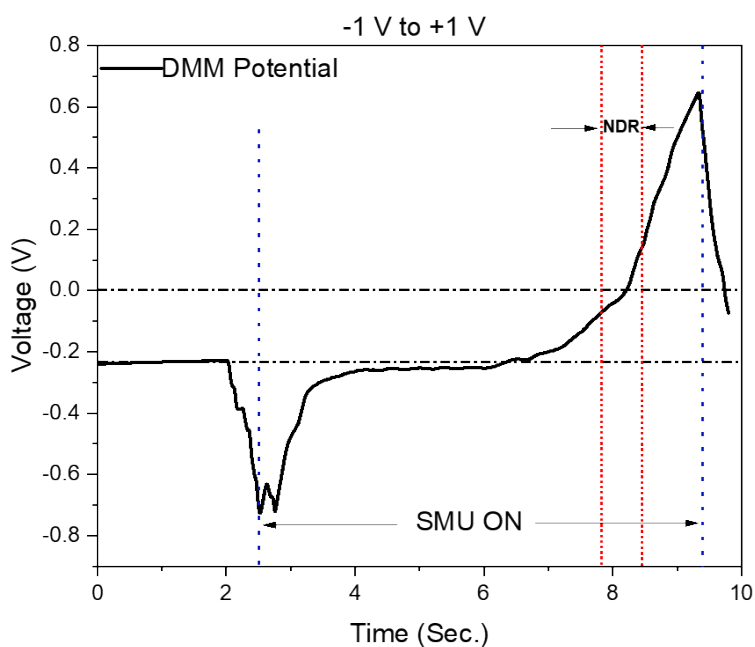

**Figure S2.** The Variation in the membrane potential by applying the source potential in the range -1 V to +1 V to the electrodes using SMU. The membrane potential was recorded using DMM. 1 mm single pore is used at a concentration gradient of  $\nabla C=1000$ .

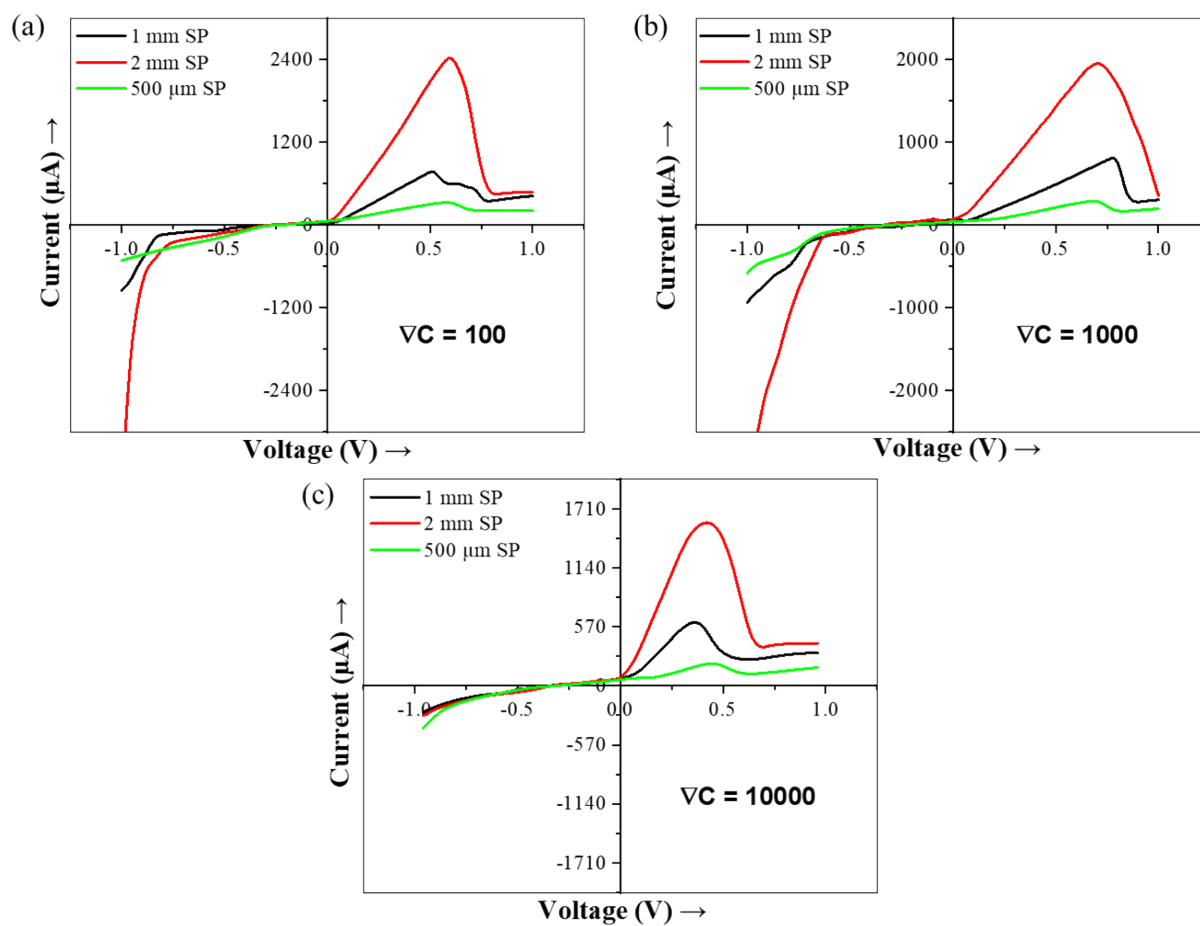

**Figure S3.** The I-V plot of the ion transport through different pores at concentration gradient of (a)  $\nabla C = 100$ , (b)  $\nabla C = 1000$ , (c)  $\nabla C = 10000$ . The black, red, and green color line curve represents the pore diameter of 1 mm SP, 2 mm SP, and 500 μm SP, respectively. SP corresponds to a single pore.

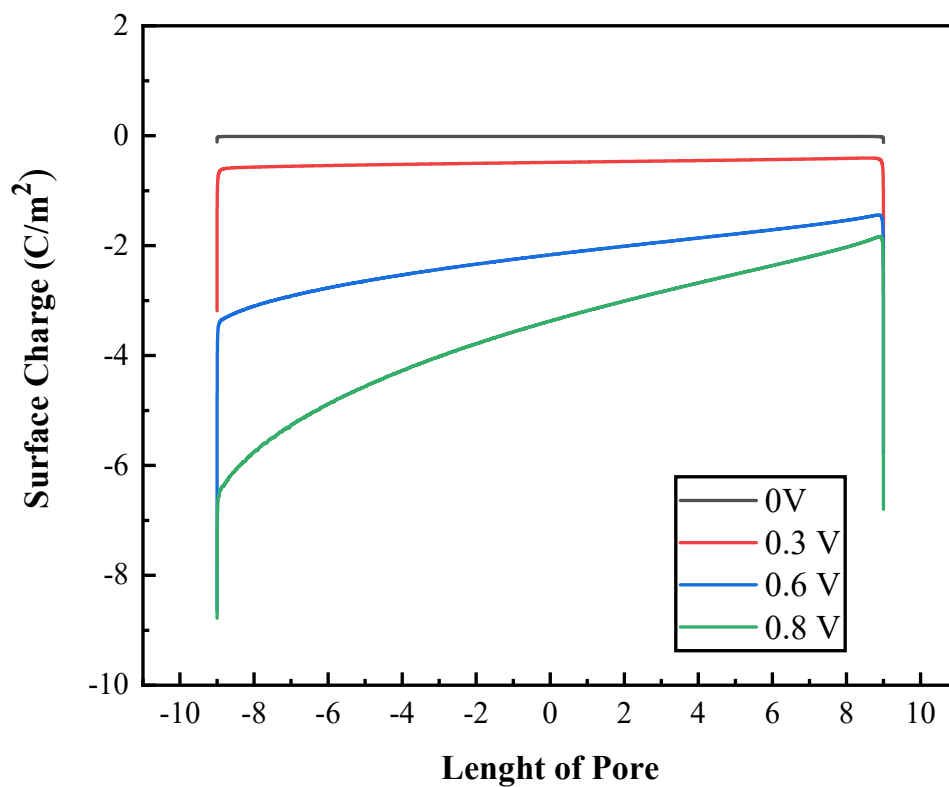

**Figure S4.** The surface charge variation along the pore length at various applied voltages.

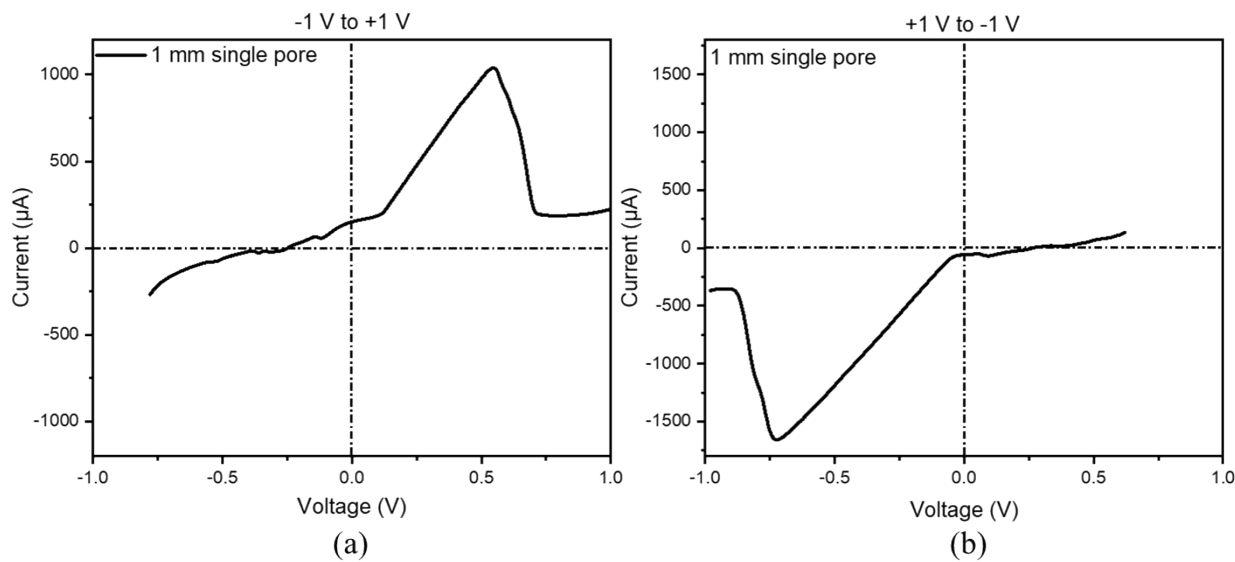

**Figure S5.** The I-V characteristic by applying the source potential **(a)** -1 to +1 V and **(b)** +1 to -1 V using 1 mm single pore at  $\nabla C=1000$ .
